# Supplementary material
Source: PubMed Central journal article supplement (PMC2856987)
Supplement: supp_M109.081059_jbc.M109.081059-1.pdf [file supp_M109.081059_jbc.M109.081059-1.pdf]

## SUPPLEMENTAL MATERIAL

Figure S1. **Preparation of disaccharides.** *N*-sulfo heparosan was incubated with C<sub>5</sub>-epimerase first, followed by 2-*O*-sulfation using 2OST WT. After purified, the modified polysaccharide was degraded into disaccharide using the reported method (1).

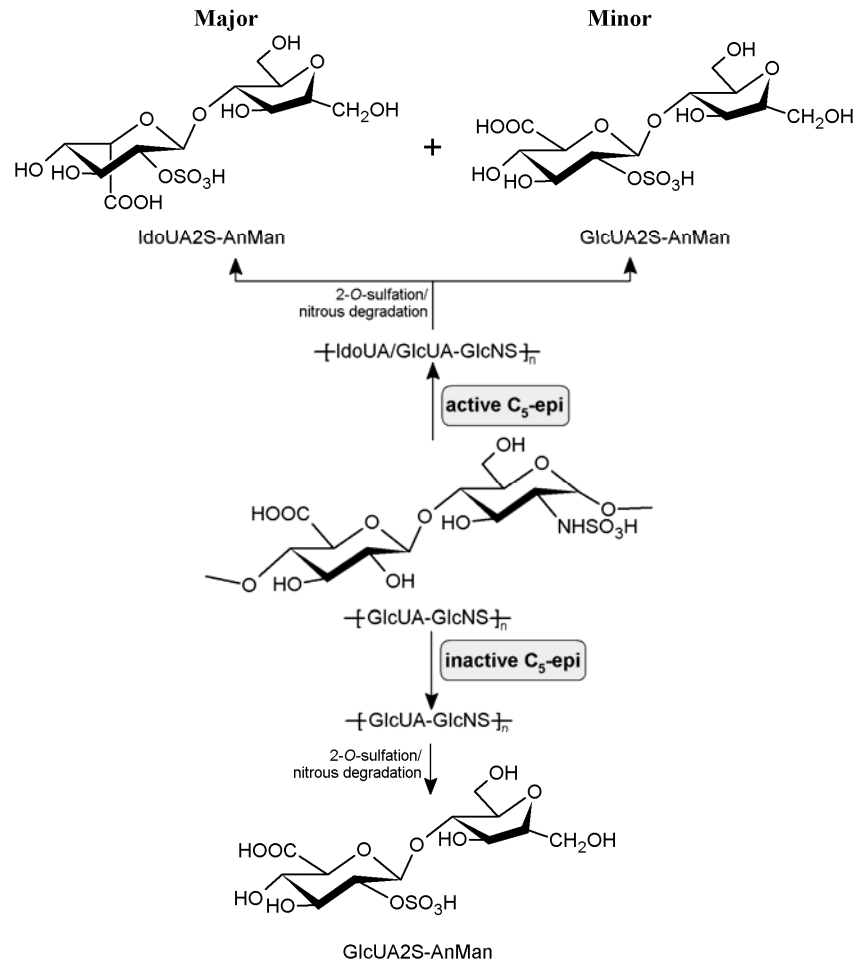

1. Shively, J. E., and Conrad, H. E. (1976) *Biochemistry* **15**, 3932-3942
